# Supplementary material for: Discovery of CCDC188 gene as a novel genetic target for human acephalic spermatozoa syndrome
Source: PubMed Central journal article supplement (PMC11365554; doi:10.1093/procel/pwae018), 2024-04-15
Supplement: pwae018_suppl_supplementary_material.pdf [file pwae018_suppl_supplementary_material.pdf]

## **Supplemental Materials**

### **Materials and methods**

#### **Study participants**

An infertile men, his brother, and his parents were recruited at the Peking Union Medical College Hospital (Beijing, China). The study was conducted in accordance with the principles of the Declaration of Helsinki and approved by the institutional review boards at the Peking Union Medical College Hospital. Signed informed consents were obtained from all subjects participating in the study. The patient exhibited a normal karyotype (46, XY) and normal hormone levels; no microdeletions were found on the Y chromosome. Five milliliters of peripheral blood was collected from the brothers and his parents.

#### **WES and Sanger sequencing**

Genomic DNA was isolated from peripheral blood of the subjects via QIAamp DNA Blood Mini Kit (QIAGEN, USA). Agilent SureSelect Human All Exon V6 Kit (Agilent Technologies, USA) was applied to exon capture and Illumina HiSeq X system was utilized to perform sequencing according to the manufacturer's introductions. The average sequencing depth on targets was  $\sim 107\times$ , and the ratio of the target fraction covered at minimum  $10\times$  was 99.5%. Reads were mapped to the human genome reference (GRCh37/hg19) by the Burrows Wheeler Aligner (BWA) software. ANNOVAR software was utilized for functional annotation via various databases, including dbSNP, 1000 Genomes Project, ExAC, and HGMD. The Genome Analysis Toolkit (GATK 3.7) was employed to identify and quality-filter the variants. Sanger sequencing was applied to verify the mutations detected by WES in the proband, his brother, and his parents. The primers of Sanger sequencing were listed in the Table S4.

#### ***Ccdc188*-KO mice**

Animal experiments were approved by the Animal Care and Use Committee of

the College of Life Sciences, Beijing Normal University. The *Ccdc188* gene (NCBI: XM\_011246064.4; Ensembl: ENSMUSG00000090777) has 4 transcripts and 8 exons and is located on mouse chromosome 16. Exons 1~8 of the *Ccdc188-202* (ENSMUST00000231369) transcript were selected as the knockout region. Mouse zygotes were coinjected with an RNA mixture of Cas9 mRNA (TriLink BioTechnologies, CA, USA) and sgRNAs. The sgRNA sequence was provided in Table S5. The injected zygotes were transferred into pseudopregnant recipients to obtain the F0 generation. DNA was extracted from tail tissues from 7-day-old offspring and PCR amplification was carried out with genotyping primers using the Mouse Tissue Direct PCR Kit (Tiangen Biotech, China). The founder mice were mated with wild-type females, giving rise to heterozygous mice harbouring a 2073 bp deletion in the *Ccdc188* gene. A stable F1 generation (heterozygous mice) was obtained by mating positive F0 generation mice with wild-type C57BL/6JG-pt mice.

### **CCDC188 antibody**

Full-length mouse CCDC188 was cloned into the pET-N-His-C-His vector (Beyotime, Shanghai, China) and then transfected into the ER2566 E. coli strain (Weidi Biotechnology, Shanghai, China). Protein expression was induced by 1 mM IPTG (Beyotime) at 30°C overnight. After centrifugation, the bacterial pellet was resuspended in buffer (50 mM Tris-HCl pH 8.0, 200 mM NaCl), and the proteins were released by sonication. After centrifugation, anti-His beads (Beyotime) were added to the supernatant and incubated overnight at 4°C. After washing, recombinant protein was eluted with 250 mM imidazole (Beyotime). Recombinant CCDC188 protein was emulsified at a 1:1 ratio (v/v) with Freund's complete adjuvant (Beyotime) and administered subcutaneously into ICR female mice at multiple points. For the subsequent three immunizations, recombinant CCDC188 protein was emulsified with incomplete Freund's adjuvant (Beyotime) at an interval of 2 weeks. One week after the last immunization, blood was collected, and the serum was separated.

### **Fertility testing**

To confirm the fertility of *Ccdc188*-KO male mice, natural mating tests were conducted. Briefly, adult *Ccdc188*-KO male mice and their littermate wild-type mice ( $n=3$  each) were mated with wild-type C57BL/6J females (male: female=1:2) for two months. The vaginal plugs of the mice were examined every morning. Female mice with vaginal plugs were separately fed, and female mice were replenished. The number of pregnant females was recorded.

### **Semen analysis**

Sperm counts were determined using a fertility counting chamber (Makler, Israel) under a light microscope. Sperm mobility was assessed via the application of a computer-assisted sperm analysis (CASA) system (SAS Medical, China). The sperm suspension was mounted on a glass slide, air-dried, and fixed with 4% PFA for 20 min at room temperature. The slides were stained with Papanicolaou solution (Solarbio, Beijing, China) and observed using a DM500 optical microscope (Leica, Germany).

### **Histological analysis**

The testes and caudal epididymis were dissected and fixed in 4% PFA overnight at 4°C. Fixed tissues were embedded in paraffin, sectioned (5  $\mu$ m thick), dewaxed, and rehydrated. The sections were stained with Periodic Acid Schiff's solution or hematoxylin-eosin staining (H&E) solution before imaging using a Leica DM-500 optical microscope (Leica Microsystems, German).

### **SEM**

Sperm were fixed with 2.5% (vol/vol) glutaraldehyde in 0.1 M phosphate buffer (pH 7.4) at room temperature for 30 min and then deposited on coverslips. The coverslips were dehydrated via an ascending gradient of 50%, 70%, 95%, and 100% ethanol, and air-dried. Specimens were then attached to specimen holders and coated with gold particles using an ion sputter coater before being viewed with a JSM-IT300 scanning electron microscope (JEOL, Tokyo, Japan).

## **TEM**

Sperm were fixed with 2.5% (vol/vol) glutaraldehyde in 0.1 M phosphate buffer (pH 7.4) at 4°C. The samples were washed four times in phosphate buffer and first immersed in 1% (wt/vol) OsO<sub>4</sub> and 1.5% (wt/vol) potassium ferricyanide aqueous solution at 4°C for 2 h. After washing, the samples were dehydrated through graded alcohol into pure acetone. Samples were infiltrated in a graded mixture of acetone and SPI-PON812 resin, and then the pure resin was changed. The specimens were embedded in pure resin with 1.5% BDMA, polymerized for 12 h at 45°C and 48 h at 60°C, cut into ultrathin sections (70 nm thick), and then stained with uranyl acetate and lead citrate for subsequent observation and photography with a Tecnai G2 Spirit 120 kV (FEI) electron microscope.

## **IP-MS**

Testes were collected from adult C57BL/6JG-pt mice and lysed with Pierce™ IP Lysis Buffer (Thermo Fisher, CA, USA). Protein lysates were incubated overnight with 2 µg CCDC188 antibody or IgG at 4°C. The lysates were then incubated with 20 µl Pierce™ Protein A/G-conjugated Agarose for 4 h at 4°C. IP products were digested by trypsin digestion for 4 h at 37°C. Separation was performed by a Thermo UltiMate 3000 UHPLC (Thermo Scientific, MA, USA). The peptides separated by liquid phase chromatography were ionized by a nanoESI source and then passed to a tandem mass spectrometer Q-Exactive HF-X (Thermo Fisher Scientific, San Jose, CA) for DDA (Data Dependent Acquisition) mode detection. Protein identification uses experimental MS/MS data and aligns them with theoretical MS/MS data from a database (i.e., UniProt) to obtain results. Mascot 2.3.02 search, quality control, and iBAQ quantification were subsequently performed. The mass spectrometry data have been deposited to the ProteomeXchange Consortium with the dataset identifier PXD045762.

## **co-IP**

HEK293T line was obtained from ATCC (American Type Culture Collection) and authenticated using STR profiling test. HEK293T cells were transfected with Flag and/or Myc-tagged plasmids as indicated in respective figure legends. The primers for plasmid construction were provided in Table S6. Forty-eight hours after transfection, cells were lysed with Pierce™ IP Lysis Buffer (Thermo Fisher, CA, USA) for 30 min at 4°C and then centrifuged at 12,000 × g for 10 min. Protein lysates were incubated overnight with Myc-Tag antibody (2 µg) or Flag-tag antibody (2 µg) at 4°C. The lysates were then incubated with 20 µl Pierce™ Protein A/G-conjugated Agarose for 4 h at 4°C. The agarose beads were washed five times with Pierce™ IP Lysis Buffer and boiled for 5 min in 1×SDS loading buffer. Input and IP samples were analysed by Western blotting using HRP conjugated anti-Flag-Tag or anti-Myc-Tag antibodies. Detailed information of antibodies was provided in Table S7.

## **Western blotting**

Proteins from mouse testes were extracted using RIPA lysis buffer containing 1 mM PMSF and protease inhibitors on ice. Supernatants were collected following centrifugation at 12,000 × g for 10 min. Proteins were electrophoresed in 10% SDS–PAGE gels and transferred to nitrocellulose membranes (GE Healthcare, USA). The blots were blocked in 5% milk and incubated with primary antibodies overnight at 4°C, followed by incubation with anti-rabbit or mouse IgG H&L (HRP) for 1 h. β-Actin served as an internal control. The signals were evaluated using Super ECL Plus Western Blotting Substrate and a Tanon-5200 Multi chemiluminescence imaging system (China). Detailed information of antibodies was provided in Table S7.

## **Immunofluorescence**

After permeabilization with 1% Triton X-100 for 1 h, the slides of sperm were blocked with 5% goat serum for 1 h. Primary antibodies were added and

incubated overnight at 4°C. Detailed information of primary antibodies were provided in Table S7. After washing three times with 1×PBS, slides were incubated with Alexa Fluor 484-labelled or 555-labelled donkey anti-rabbit/mouse IgG (Beyotime, Shanghai, China) for 1 h at room temperature. The nuclei were counterstained with DAPI dye and observed using Leica TCS SP2 microscope.

### **Statistics**

Data are presented as the mean ± standard deviation (SD) and were analysed using GraphPad Prism version 5.01 (GraphPad Software). Student's *t* test (unpaired, two-tailed) was used for the statistical analyses.

## Supplemental Figure Legends

**Figure S1. Semen analysis of the proband, the flowchart of WES and variant-filtration pipeline.** (A) Representative images of Papanicolaou staining and scanning electron microscope (SEM) of sperm were shown. Spermatozoa in the semen of the proband showed 100% headless tails. Scale bars, 10 or 5  $\mu\text{m}$ . (B) Variants were screened out following the criteria: (1) variants affected coding exons or splice sites (including missense, nonsense, frameshift, and splicing site variants); (2) a minor allele frequency (MAF) was  $<1\%$  in ExAC for autosomal variants and a MAF was  $<1\%$  in ExAC for variants on the X chromosome; (3) variants were predicted potentially deleterious by at least a pathogenicity prediction software; and (4) variants were consistent with the recessive genetic pattern (homozygous or compound heterozygous) or X-linked inheritance (hemizygous).

**Figure S2. Alignment result of human and mouse CCDC188.** (A) Alignment result of human CCDC188 and mouse CCDC188 was analyzed by M-Coffee website (<https://tcoffee.crg.eu/>). (B) According to the NCBI database, *Ccdc188* mRNA was specifically expressed in the testes among different mouse tissues. According to the Single Cell Expression Atlas, single-cell RNA sequencing of mouse germ cells indicated that *Ccdc188* mRNA was restricted to spermatid subpopulation. Immunofluorescence staining of CCDC188 in a mouse spermatozoon, showing the HTCA-specific localization. For a negative control, IgG was added instead of the primary antibody. Flagella and nucleus was stained with acetylated Tubulin (ac-TUB) and DAPI, respectively. Scale bar, 5  $\mu\text{m}$ . (C) The expression of CCDC188, SUN5, and PMFBP1 in sperm samples from the proband and a normal control.  $\beta$ -actin served as a loading control.

**Figure S3. More detailed analysis of *Ccdc188*-KO mice.** (A) Spermatogenesis in *Ccdc188*-KO mice was revealed by Periodic acid-Schiff staining of testis sections. Seminiferous tubules could be divided into I-XII

stages and 16 steps of spermatids could be identified. Scale bars, 50 or 10  $\mu\text{m}$ . **(B)** Papanicolaou stain of sperm smear from WT mice and *Ccdc188*-KO mice. Scale bars, 10  $\mu\text{m}$ . **(C)** Transmission electron microscope (TEM) of sperm from WT mice and *Ccdc188*-KO mice. Scale bars, 500 nm. Nu, nuclear; Acr, acrosome; Ax, axoneme; Mp, midpiece; Pp, principle piece; HTCA, head-tail coupling apparatus; Mt, mitochondrial sheath. **(D)** Intracytoplasmic sperm injection (ICSI) outcomes. *Ccdc188*-KO sperm heads were collected by centrifugation in 70% Percoll (Sigma, P4937) followed by three washes in M2 medium. Single sperm heads were picked up from the sperm suspension and injected into wild-type oocytes using a micromanipulator with a Piezoelectric actuating pipette. 2-cell embryos and blastocysts were shown. Scale bar, 100  $\mu\text{m}$ .



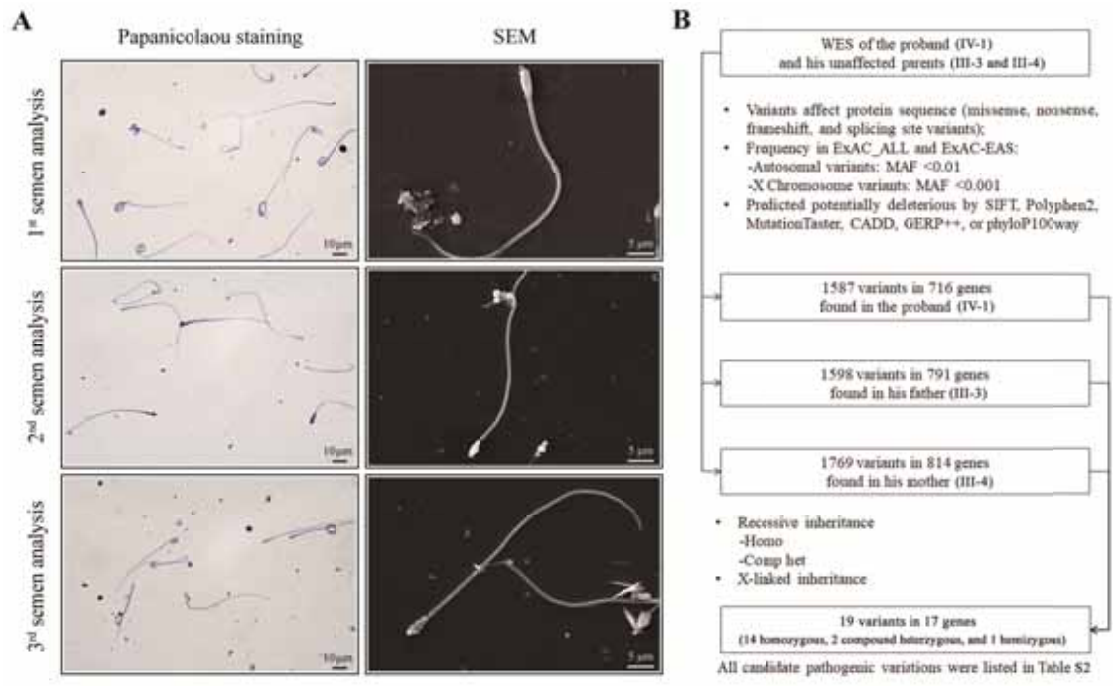

Figure S1.



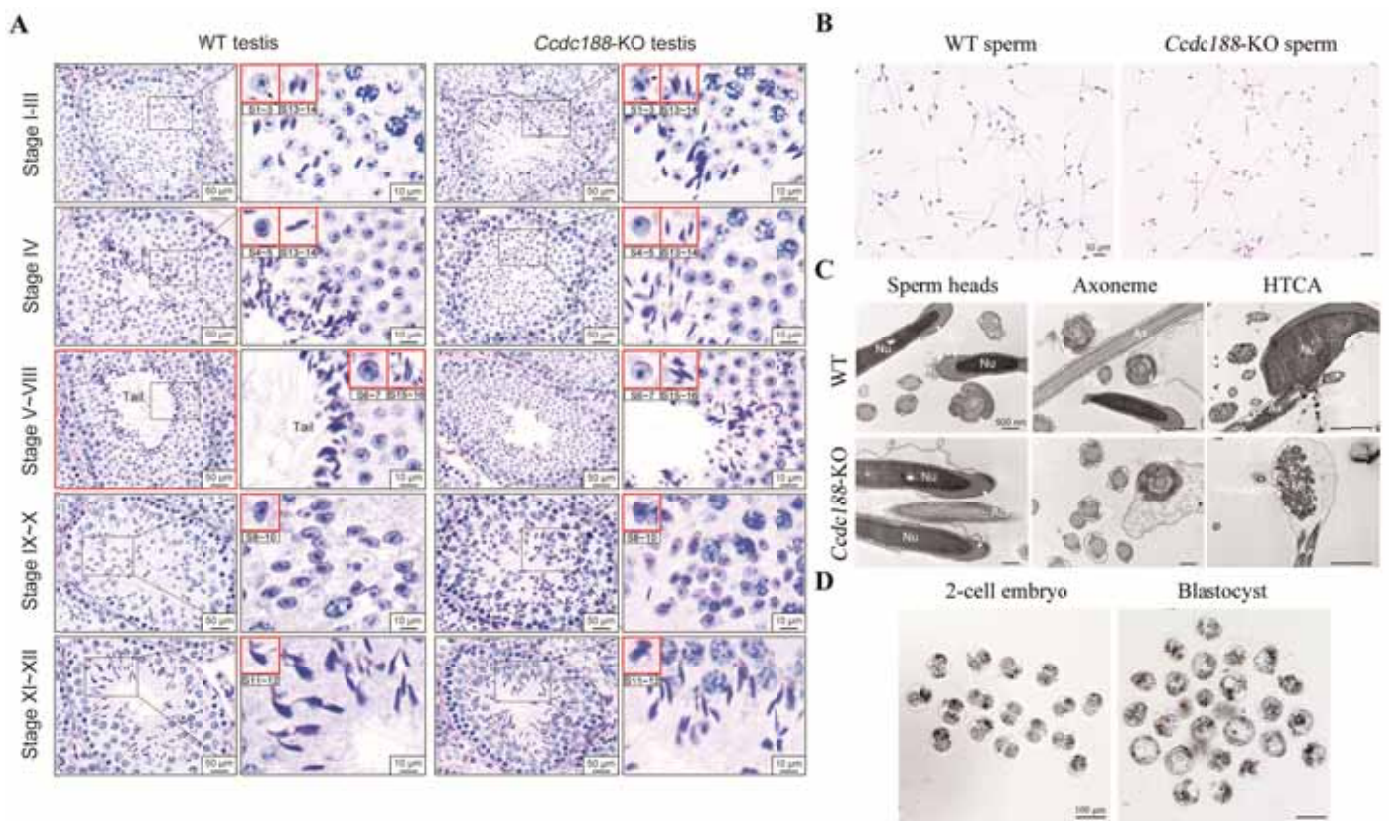

**Figure S3.**

## **Supplementary Table Legends**

**Table S1.** Proband's information and his semen characteristics.

**Table S2.** Candidate pathogenic variations identified in the proband by WES and analysis.

**Table S3.** CCDC188-interacting proteins in mouse testis protein lysates identified by IP-MS.

**Table S4.** Primers used for the verification of the c.937C>T variant affecting the human *CCDC188* gene.

**Table S5.** The sgRNA sequence to generate *Ccdc188*-KO mouse strain.

**Table S6.** Primers for plasmid construction.

**Table S7.** All antibodies used in this study.

**Video S1.** The motility and morphology of sperm from WT mice.

**Video S2.** The motility and morphology of sperm from *Ccdc188*-KO mice.

**Table S1. Proband's information and his semen characteristics.**

| Subject                             | IV-1             |                  |
|-------------------------------------|------------------|------------------|
| Age                                 | 30 years         |                  |
| Physical examination                | normal           |                  |
| Karyotype                           | 46, XY           |                  |
| Y Chr micro-deletion                | no               |                  |
|                                     | Semen Parameters | Reference limits |
| Volume (ml)                         | 2.7              | >1.5             |
| Concentration (10 <sup>6</sup> /ml) | 2.77             | >15              |
| Motility (%)                        | 24.4             | >40              |
| Progressive motility (%)            | 14.64            | >32              |
| Morphological normality (%)         | 0                | >4               |
| Acephalic sperm (%)                 | 100              |                  |

Lower reference limits for semen analysis are provided according to the World Health Organization (WHO) standards. At least 200 spermatozoa were observed for morphology analysis.

**Table S2. Candidate pathogenic variations identified in the proband by WES and analysis.**

| Gene                  | Type                 | Variation                                         | ExAC_<br>ALL | ExAC_<br>_EAS | SIFT | Polyp<br>hen2 | Mutation<br>Taster | CADD      | GERP<br>++  | phyloP<br>100way | Inherited<br>pattern |
|-----------------------|----------------------|---------------------------------------------------|--------------|---------------|------|---------------|--------------------|-----------|-------------|------------------|----------------------|
| <i>ANKRD2</i>         | nonsynonymous<br>SNV | ANKRD2:NM_001291218<br>c.C17G:p.P6R               | .            | .             | .    | .             | .                  | .         | .           | .                | homozygous           |
| <b><i>CCDC188</i></b> | <b>stopgain</b>      | <b>CCDC188:NM_001365892.2<br/>c.C937T:p.R313*</b> | .            | .             | .    | .             | .                  | <b>40</b> | <b>3.79</b> | <b>0.907</b>     | <b>homozygous</b>    |
| <i>CCND2</i>          | nonsynonymous<br>SNV | CCND2:NM_001759<br>c.C64G:p.R22G                  | 2.58E-05     | 0.0004        | T    | B             | N                  | 14.83     | 3.09        | -0.191           | homozygous           |
| <i>FAT4</i>           | nonsynonymous<br>SNV | FAT4:NM_001291285<br>c.A3067G:p.K1023E            | 4.14E-05     | 0.0006        | D    | B             | D                  | 13.9      | 5           | 2.145            | homozygous           |
| <i>FOXD4L4</i>        | nonsynonymous<br>SNV | FOXD4L4:NM_199244<br>c.G839C:p.G280A              | .            | .             | T    | .             | N                  | 2.608     | 2.18        | -0.517           | homozygous           |
| <i>GGT2</i>           | nonsynonymous<br>SNV | GGT2:NM_001351304<br>c.C1664T:p.T555M             | .            | .             | T    | .             | N                  | 12.67     | 1.68        | 2.398            | homozygous           |
| <i>GOLGA6L9</i>       | nonsynonymous<br>SNV | GOLGA6L9:NM_198181<br>c.C451G:p.Q151E             | .            | .             | T    | .             | .                  | 5.077     | 0.046       | 0.047            | homozygous           |
| <i>ITPRIPL2</i>       | nonsynonymous<br>SNV | ITPRIPL2:NM_001034841<br>c.G1462C:p.A488P         | .            | .             | T    | B             | N                  | 12.53     | 5.22        | 0.01             | homozygous           |
| <i>KIAA1024</i>       | nonsynonymous<br>SNV | KIAA1024:NM_015206<br>c.C862T:p.P288S             | 8.24E-06     | 0             | D    | .             | D                  | 1.481     | 5.29        | 0.763            | homozygous           |
| <i>LOC100129307</i>   | nonsynonymous<br>SNV | LOC100129307:NM_001310140<br>c.C446T:p.T149M      | .            | .             | .    | .             | .                  | .         | .           | .                | homozygous           |
| <i>MAN2C1</i>         | nonsynonymous<br>SNV | MAN2C1:NM_001256496<br>c.A1040G:p.N347S           | 1.93E-05     | 0.0003        | T    | D             | D                  | 23.7      | 5.54        | 7.434            | homozygous           |

|                  |                      |                                                      |          |        |   |   |   |       |      |        |                       |
|------------------|----------------------|------------------------------------------------------|----------|--------|---|---|---|-------|------|--------|-----------------------|
| <i>N4BP2</i>     | nonsynonymous SNV    | N4BP2:NM_018177<br>c.T2438C:p.V813A                  | .        | .      | T | P | N | 11.36 | 5.64 | 0.306  | homozygous            |
| <i>NR2E3</i>     | nonsynonymous SNV    | NR2E3:NM_014249<br>c.T809C:p.L270P                   | .        | .      | D | P | . | 28.3  | 5.36 | 7.911  | homozygous            |
| <i>RLBP1</i>     | nonsynonymous SNV    | RLBP1:NM_000326<br>c.C107T:p.P36L                    | .        | .      | T | B | N | 0.417 | 5.95 | -0.305 | homozygous            |
| <i>DPP7</i>      | nonsynonymous SNV    | DPP7:NM_013379<br>c.G1177A:p.D393N                   | 0.0003   | 0      | T | B | N | 14.14 | 4.18 | 0.289  | compound heterozygous |
| <i>DPP7</i>      | nonsynonymous SNV    | DPP7:NM_013379<br>c.G658A:p.V220M                    | 8.29E-06 | 0.0001 | D | D | D | 24.7  | 5.11 | 5.931  | compound heterozygous |
| <i>SPATA31C1</i> | frameshift insertion | SPATA31C1:NM_001145124<br>c.224_225insGC;p.C76Rfs*13 | 7.57E-05 | 0.001  | . | . | . | .     | .    | .      | compound heterozygous |
| <i>SPATA31C1</i> | stopgain             | SPATA31C1:NM_001145124<br>c.C1381T:p.Q461*           | .        | .      | . | . | . | .     | .    | .      | compound heterozygous |
| <i>GPR50</i>     | nonsynonymous SNV    | GPR50:NM_004224:exon2:c.C92<br>8T:p.H310Y            | 1.15E-05 | 0.0002 | D | P | N | 20.6  | 4.63 | 1.308  | hemizygous            |

**Table S3. CCDC188-interacting proteins in mouse testis protein lysates identified by IP-MS.**

| Protein Name   | Peptide  | Abundance<br>CCDC188-IP(1) | Peptide  | Abundance<br>IgG-IP(1) | Peptide  | Abundance<br>CCDC188-IP(2) | Peptide  | Abundance<br>IgG-IP(2) |
|----------------|----------|----------------------------|----------|------------------------|----------|----------------------------|----------|------------------------|
| ABCF1          | 4        | 1388714.447                | 3        | 95212.32778            | 2        | 4242901.428                | 1        | 0                      |
| AGO2           | 2        | 152655.7797                | 1        | 0                      | 2        | 1154051.555                | 1        | 0                      |
| AP2S1          | 2        | 3614877.672                | 1        | 0                      | 1        | 503894.9781                | 1        | 0                      |
| BCLAF1         | 5        | 4523194.505                | 1        | 0                      | 3        | 1293743.994                | 1        | 0                      |
| BUD31          | 2        | 564821.0144                | 1        | 0                      | 3        | 1425254.251                | 1        | 0                      |
| CAPZA1         | 3        | 1642419.848                | 1        | 0                      | 2        | 194774.4048                | 2        | 0                      |
| CASC3          | 2        | 992918.7054                | 1        | 49575.63559            | 2        | 58623343.77                | 1        | 80216.45187            |
| CATSPER1       | 2        | 1011079.361                | 1        | 0                      | 2        | 849897.0004                | 1        | 0                      |
| CCAR1          | 8        | 4031249.405                | 2        | 0                      | 7        | 660382.3945                | 1        | 0                      |
| <b>CCDC188</b> | <b>2</b> | <b>1311869.365</b>         | <b>1</b> | <b>0</b>               | <b>5</b> | <b>970548.8768</b>         | <b>1</b> | <b>0</b>               |
| CDC51          | 11       | 13104827.84                | 1        | 0                      | 9        | 5675866.507                | 1        | 544681.9764            |
| CHTOP          | 6        | 2088517.395                | 1        | 0                      | 6        | 1981336.724                | 1        | 0                      |
| CNTNAPP3       | 1        | 7504209.564                | 1        | 0                      | 1        | 16817706.89                | 1        | 12532122.54            |
| COIL           | 25       | 74678611.97                | 1        | 0                      | 18       | 64396007.26                | 1        | 0                      |
| CPEB4          | 1        | 179245.8426                | 1        | 0                      | 1        | 124840.073                 | 1        | 0                      |
| CPSF4          | 1        | 304545.9061                | 1        | 0                      | 2        | 299900.1592                | 1        | 0                      |
| CSNK2A1        | 7        | 7487280.357                | 1        | 0                      | 7        | 1188198.685                | 1        | 0                      |
| CTC1           | 1        | 7126.675361                | 1        | 0                      | 1        | 119080.5303                | 1        | 0                      |
| DBT            | 7        | 23089144.84                | 1        | 0                      | 4        | 5967474.351                | 1        | 0                      |
| DDX23          | 4        | 7428883.373                | 1        | 0                      | 2        | 4665188.072                | 1        | 0                      |
| DECR1          | 1        | 698217.1721                | 1        | 0                      | 2        | 1007580.592                | 1        | 0                      |
| DENN2B         | 1        | 946053.046                 | 1        | 0                      | 1        | 2070328.942                | 1        | 0                      |



|         |    |             |    |             |    |             |    |             |
|---------|----|-------------|----|-------------|----|-------------|----|-------------|
| DHX36   | 6  | 2821613.272 | 1  | 0           | 4  | 673117.3347 | 1  | 0           |
| DKC1    | 10 | 49468626.68 | 1  | 0           | 8  | 7330207.531 | 1  | 0           |
| DLAT    | 37 | 133926680.2 | 22 | 13291925.2  | 35 | 83634984.63 | 12 | 5588679.666 |
| DNAJB11 | 1  | 313881.6014 | 1  | 0           | 1  | 673732.2995 | 1  | 0           |
| DPYSL3  | 5  | 1415346.783 | 1  | 0           | 4  | 1500579.44  | 1  | 0           |
| DTYMK   | 1  | 649279.5851 | 1  | 0           | 1  | 2340462.089 | 1  | 0           |
| EIF3K   | 7  | 4499377.994 | 3  | 0           | 6  | 7280284.257 | 1  | 231859.0056 |
| ELAVL2  | 5  | 3199344.953 | 1  | 0           | 7  | 2712844.591 | 1  | 0           |
| FAM98A  | 10 | 20932272.25 | 10 | 771418.8971 | 10 | 15769718.88 | 11 | 6561275.143 |
| FBL     | 15 | 19560429.96 | 1  | 0           | 12 | 12974756.64 | 1  | 0           |
| FHL4    | 4  | 1466455.608 | 1  | 0           | 1  | 34210.48065 | 4  | 0           |
| FKBP6   | 4  | 3313521.278 | 1  | 0           | 3  | 207024.0283 | 3  | 0           |
| FYTTD1  | 7  | 108492461   | 2  | 487195.2845 | 11 | 147115892.1 | 2  | 582177.0824 |
| GAPDH   | 23 | 73160299.54 | 1  | 0           | 20 | 27468271.89 | 1  | 0           |
| GAR1    | 2  | 2461746.249 | 1  | 0           | 3  | 3653853.045 | 1  | 0           |
| GEMIN2  | 1  | 912739.3267 | 1  | 0           | 3  | 2551417.666 | 1  | 0           |
| GLYR1   | 3  | 728294.8015 | 1  | 0           | 3  | 2065617.606 | 1  | 149396.1657 |
| GM1141  | 25 | 32951978.33 | 1  | 234780.2727 | 22 | 22641669.26 | 1  | 0           |
| GSTO2   | 2  | 1090700.783 | 1  | 0           | 1  | 989636.9187 | 2  | 0           |
| GTPBP1  | 3  | 8753471.45  | 1  | 0           | 1  | 347202.2042 | 1  | 0           |
| H2BC1   | 8  | 10613130.87 | 1  | 0           | 2  | 513512.2374 | 1  | 0           |
| HILS1   | 6  | 7043675.222 | 1  | 0           | 4  | 5300687.173 | 1  | 0           |
| HMGCLL1 | 1  | 1199491.484 | 1  | 0           | 1  | 1470839.176 | 1  | 0           |
| HNRNPH3 | 19 | 100031969.2 | 1  | 0           | 22 | 53859620.15 | 1  | 0           |
| HNRNPK  | 50 | 267225348.2 | 1  | 0           | 45 | 262606491.6 | 1  | 0           |
| HNRNPR  | 14 | 12008038.34 | 1  | 0           | 10 | 6668056.089 | 1  | 0           |

|         |    |             |   |             |    |             |    |             |
|---------|----|-------------|---|-------------|----|-------------|----|-------------|
| HPX     | 1  | 29631.93889 | 1 | 0           | 4  | 180530.1379 | 1  | 0           |
| HRG     | 3  | 623449.5713 | 1 | 62296.35924 | 2  | 476764.3523 | 1  | 0           |
| HTRA2   | 4  | 43935450.43 | 1 | 0           | 1  | 424820.9758 | 1  | 0           |
| IFT122  | 7  | 2875746.477 | 1 | 0           | 10 | 6387300.101 | 1  | 0           |
| IFT140  | 7  | 913972.529  | 1 | 0           | 8  | 4255185.626 | 1  | 0           |
| IGF2BP3 | 4  | 1304967.848 | 1 | 0           | 2  | 481196.6281 | 1  | 0           |
| IQCG    | 2  | 35125311.15 | 2 | 1538288.956 | 1  | 486148.4956 | 1  | 0           |
| IQCN    | 1  | 3001302.774 | 1 | 0           | 1  | 436814.0653 | 1  | 0           |
| JCHAIN  | 6  | 9494430.946 | 1 | 132742.6217 | 6  | 9493600.46  | 1  | 0           |
| KIF27   | 2  | 3466099.229 | 1 | 0           | 1  | 505793.0349 | 1  | 0           |
| KLHL36  | 1  | 15777.63314 | 1 | 0           | 3  | 555947.6181 | 1  | 0           |
| LACTB   | 18 | 14893899.07 | 3 | 583953.9275 | 13 | 25521156.75 | 3  | 233032.2075 |
| LARP4   | 1  | 264877.9544 | 1 | 0           | 2  | 3004954.942 | 1  | 0           |
| LASP1   | 2  | 626777.5108 | 1 | 0           | 2  | 537715.17   | 1  | 0           |
| LIG3    | 8  | 3532905.85  | 1 | 0           | 5  | 224741.4296 | 1  | 0           |
| LSM14B  | 4  | 449602.1851 | 1 | 0           | 5  | 470322.3384 | 3  | 0           |
| MAGOHB  | 7  | 9245064.217 | 1 | 0           | 4  | 7363417.545 | 2  | 190003.6757 |
| MEIOC   | 5  | 397919.7256 | 1 | 0           | 2  | 1597310.738 | 1  | 0           |
| MFAP1B  | 5  | 37961019.02 | 3 | 449290.234  | 2  | 6363759.947 | 2  | 98546.5408  |
| MLF1    | 1  | 450345.848  | 1 | 0           | 1  | 822575.4188 | 1  | 0           |
| MTDH    | 2  | 712844.2105 | 1 | 0           | 1  | 414068.8639 | 1  | 0           |
| MUG1    | 3  | 2539508.791 | 1 | 0           | 4  | 505482.0366 | 1  | 0           |
| MVP     | 18 | 9884304.164 | 1 | 0           | 14 | 11250573.34 | 14 | 2824185.32  |
| NCBP2   | 3  | 3308632.088 | 1 | 0           | 4  | 5788926.661 | 1  | 0           |
| NCL     | 17 | 24813675.37 | 1 | 0           | 13 | 15361437.67 | 1  | 0           |
| NCOA5   | 31 | 138627281.9 | 9 | 3520745.787 | 22 | 234800770.2 | 8  | 2400827.061 |

|               |           |                    |          |             |           |                    |          |             |
|---------------|-----------|--------------------|----------|-------------|-----------|--------------------|----------|-------------|
| NOP56         | 21        | 42735640.67        | 1        | 0           | 11        | 31085690.62        | 1        | 0           |
| NUDT16L1      | 5         | 1776107.18         | 1        | 0           | 6         | 2455243.722        | 1        | 0           |
| NUFIP2        | 5         | 9830345.793        | 1        | 0           | 2         | 1169484.921        | 1        | 0           |
| PAFAH1B1      | 1         | 20081060.92        | 1        | 0           | 1         | 462486.0123        | 1        | 0           |
| PDHA1         | 1         | 8085309.043        | 1        | 0           | 2         | 9281603.441        | 1        | 0           |
| PDHX          | 12        | 13212527.5         | 4        | 1265162.762 | 8         | 6877111.228        | 2        | 561136.9601 |
| PDZD8         | 6         | 391487.3298        | 1        | 0           | 8         | 3940606.762        | 1        | 0           |
| PGAM5         | 8         | 11300069.41        | 2        | 218149.5239 | 8         | 19177670.66        | 6        | 784162.1291 |
| PGM5          | 1         | 356234.9107        | 1        | 0           | 1         | 917687.3339        | 1        | 0           |
| <b>PMFBP1</b> | <b>11</b> | <b>4609621.473</b> | <b>1</b> | <b>0</b>    | <b>15</b> | <b>5147362.322</b> | <b>1</b> | <b>0</b>    |
| PNN           | 5         | 1066786.492        | 1        | 0           | 7         | 1461687.601        | 1        | 0           |
| PPIL1         | 1         | 3005002.991        | 1        | 0           | 1         | 3213788.856        | 1        | 0           |
| PPP1CC        | 1         | 339867.8999        | 3        | 0           | 1         | 226285.0025        | 1        | 0           |
| PPP2R2A       | 2         | 6776403.406        | 1        | 0           | 2         | 3416480.747        | 1        | 0           |
| PRM2          | 1         | 947267.2122        | 1        | 0           | 1         | 563387.8363        | 1        | 0           |
| PRPF3         | 1         | 148635.2907        | 1        | 0           | 1         | 404123.2916        | 1        | 0           |
| PRPF40A       | 4         | 17708661.24        | 1        | 60893.14595 | 1         | 142862.0523        | 1        | 0           |
| PRPS1L1       | 1         | 112551.7808        | 1        | 0           | 1         | 321106.2213        | 1        | 0           |
| PSIP1         | 4         | 10629084.9         | 1        | 0           | 2         | 426408.1445        | 1        | 0           |
| PSMA6         | 1         | 68843.09642        | 1        | 0           | 3         | 611094.3895        | 1        | 0           |
| PSMG1         | 1         | 145836.0981        | 1        | 0           | 1         | 688543.5786        | 1        | 68366.39034 |
| PUM1          | 1         | 198427.8182        | 1        | 0           | 2         | 796560.564         | 1        | 0           |
| PWWP3A        | 6         | 863395.8481        | 1        | 0           | 2         | 43362711.76        | 1        | 309944.7683 |
| PZP           | 5         | 14163551.23        | 1        | 0           | 6         | 10883084.66        | 1        | 0           |
| QSOX2         | 1         | 2438732.843        | 1        | 0           | 1         | 1333546.842        | 1        | 0           |
| RAB1A         | 3         | 5287063.235        | 1        | 0           | 2         | 2438782.327        | 1        | 0           |

|          |    |             |   |             |    |             |   |             |
|----------|----|-------------|---|-------------|----|-------------|---|-------------|
| RALY     | 5  | 1490250.323 | 1 | 0           | 7  | 2494974.706 | 1 | 0           |
| RBM46    | 17 | 29198159.46 | 5 | 987857.2484 | 13 | 13278172.51 | 4 | 324515.995  |
| RBMXL1   | 8  | 7869096.992 | 1 | 0           | 7  | 4973063.485 | 1 | 0           |
| RBX1     | 2  | 1312561.511 | 1 | 0           | 1  | 400921.1939 | 1 | 0           |
| RDH11    | 3  | 1800705.155 | 1 | 121969.9877 | 4  | 34152717.55 | 4 | 740828.9022 |
| RNF151   | 1  | 297670.777  | 1 | 0           | 1  | 384138.6274 | 1 | 36055.14448 |
| RPL12    | 6  | 17086516.54 | 1 | 0           | 10 | 27267234.37 | 1 | 0           |
| RPL13A   | 9  | 1709396134  | 1 | 0           | 9  | 928160939.1 | 1 | 0           |
| RPL18    | 5  | 18327699.07 | 1 | 0           | 5  | 158696671.4 | 1 | 0           |
| RPL18A   | 4  | 2395504.919 | 3 | 235627.5863 | 5  | 6244483.778 | 3 | 269079.9889 |
| RPL21    | 2  | 3936175.5   | 1 | 0           | 5  | 7863615.289 | 1 | 0           |
| RPL23A   | 2  | 1779485.162 | 1 | 0           | 3  | 8254981.314 | 1 | 0           |
| RPL27    | 4  | 3020409.469 | 1 | 0           | 4  | 9443284.84  | 1 | 0           |
| RPL28    | 1  | 359613.6991 | 1 | 0           | 2  | 1629887.649 | 1 | 0           |
| RPL32    | 1  | 433734.7537 | 1 | 0           | 1  | 322588.5188 | 1 | 0           |
| RPL34    | 3  | 3109504.403 | 1 | 0           | 2  | 2507421.252 | 1 | 0           |
| RPL37A   | 1  | 11750249.53 | 1 | 0           | 1  | 7712229.507 | 1 | 0           |
| RPL6     | 10 | 16094560.98 | 1 | 0           | 8  | 7124427.354 | 1 | 0           |
| RPL7A    | 16 | 20085037.26 | 4 | 684312.9651 | 11 | 24206876.79 | 4 | 1827427.537 |
| RPL8     | 7  | 43839028.01 | 1 | 0           | 6  | 63474106.51 | 3 | 4228464.973 |
| RPL9-PS6 | 13 | 15349486.24 | 1 | 0           | 12 | 5457869.069 | 4 | 43725.33374 |
| RPLP1    | 1  | 434131.8748 | 1 | 0           | 1  | 701211.9641 | 1 | 0           |
| RPLP2    | 5  | 1455154.89  | 1 | 0           | 4  | 4326705.821 | 1 | 0           |
| RPS13    | 5  | 6220625.358 | 3 | 520356.1044 | 8  | 11952028.44 | 2 | 361744.4508 |
| RPS15A   | 7  | 12594951.82 | 4 | 502262.8264 | 10 | 15482089.4  | 5 | 1244454.801 |
| RPS23    | 1  | 2152244.538 | 1 | 51042.73157 | 3  | 3607101.796 | 1 | 159216.9142 |

|             |          |                    |          |             |          |                    |          |             |
|-------------|----------|--------------------|----------|-------------|----------|--------------------|----------|-------------|
| RPS26       | 1        | 1001845.477        | 1        | 0           | 2        | 3183766.785        | 1        | 0           |
| RPS4X       | 5        | 4987788.016        | 1        | 174202.9759 | 5        | 4461532.609        | 1        | 362507.8743 |
| RPS6        | 7        | 8830206.678        | 3        | 720345.5958 | 10       | 13207012.48        | 1        | 0           |
| RPS8        | 8        | 17963135.67        | 1        | 0           | 8        | 18867533.84        | 1        | 0           |
| SAMD4B      | 1        | 485912.5797        | 1        | 0           | 1        | 208032.9873        | 1        | 0           |
| SERPING1    | 3        | 3183204.49         | 1        | 0           | 5        | 2507668.953        | 1        | 0           |
| SLTM        | 4        | 2045135.06         | 1        | 0           | 2        | 795795.2605        | 1        | 0           |
| SNRPA       | 2        | 1173479.517        | 1        | 0           | 2        | 1326032.904        | 1        | 0           |
| SNRPA1      | 8        | 5972935.128        | 1        | 0           | 7        | 6738725.906        | 1        | 0           |
| SNRPD2      | 9        | 8216900.039        | 1        | 0           | 6        | 8787656.622        | 1        | 0           |
| SNRPD3      | 3        | 2576075.644        | 1        | 152678.062  | 3        | 5173862.61         | 1        | 205003.6296 |
| SON         | 3        | 3513074.907        | 1        | 0           | 1        | 489896.8398        | 1        | 0           |
| SPAG4       | 5        | 3896083.305        | 1        | 0           | 3        | 517147.6851        | 1        | 0           |
| SPATS2      | 6        | 12724164.34        | 2        | 121736.5245 | 6        | 1365592.534        | 1        | 0           |
| SRSF5       | 6        | 3809745.394        | 1        | 0           | 5        | 3660262.477        | 1        | 0           |
| SRSF6       | 3        | 3227869.177        | 1        | 0           | 4        | 7892027.259        | 1        | 0           |
| SRSF9       | 5        | 1250157.582        | 1        | 47814.80489 | 3        | 1144369.911        | 1        | 0           |
| SSX2IP      | 1        | 279384.7636        | 1        | 0           | 2        | 254050.5293        | 1        | 0           |
| STAU1       | 4        | 5891621.212        | 1        | 0           | 4        | 2279474.875        | 1        | 115330.1248 |
| STK39       | 1        | 398296.7047        | 1        | 0           | 1        | 212692.9631        | 1        | 0           |
| STRBP       | 6        | 1500736.938        | 1        | 0           | 5        | 2479776.339        | 1        | 0           |
| SUGP2       | 36       | 20342484.2         | 11       | 1095000.184 | 36       | 21366997.03        | 3        | 845301.3373 |
| <b>SUN5</b> | <b>3</b> | <b>6093713.452</b> | <b>1</b> | <b>0</b>    | <b>4</b> | <b>24981983.37</b> | <b>1</b> | <b>0</b>    |
| TARBP2      | 7        | 9782645.082        | 1        | 0           | 6        | 3663424.378        | 1        | 0           |
| TDRD3       | 4        | 3875700.652        | 1        | 0           | 3        | 1589801.325        | 1        | 0           |
| TEKT1       | 5        | 1290149.515        | 1        | 0           | 3        | 417467.9546        | 2        | 0           |

|          |    |             |   |             |    |             |   |             |
|----------|----|-------------|---|-------------|----|-------------|---|-------------|
| TEX13D   | 1  | 6834964.343 | 1 | 0           | 2  | 8536619.257 | 1 | 0           |
| TEX30    | 1  | 972808.1865 | 1 | 0           | 1  | 1366147.708 | 1 | 0           |
| TEX35    | 1  | 471337.2235 | 1 | 0           | 2  | 1049916.599 | 1 | 0           |
| THOC2    | 3  | 283097.2048 | 1 | 0           | 2  | 238613.4259 | 1 | 0           |
| THOC6    | 1  | 373626.9266 | 1 | 0           | 1  | 1177110.808 | 1 | 0           |
| TMCO5    | 2  | 2172693.364 | 1 | 0           | 3  | 2471815.266 | 1 | 0           |
| TMEM191C | 4  | 9591313.932 | 1 | 0           | 6  | 9698863.584 | 1 | 0           |
| TNRC6A   | 1  | 221779.5289 | 1 | 0           | 1  | 2278614.358 | 1 | 0           |
| TOP2A    | 4  | 1194894.309 | 1 | 0           | 1  | 430349.9613 | 1 | 0           |
| TOP3B    | 6  | 13211713.25 | 1 | 0           | 5  | 11632956.29 | 1 | 0           |
| TRA2B    | 6  | 25190015.05 | 3 | 741911.0002 | 7  | 18178421.99 | 3 | 1660932.467 |
| TRIM14   | 1  | 152146.2417 | 1 | 0           | 1  | 128102.3724 | 1 | 0           |
| UPF2     | 3  | 494992.961  | 1 | 0           | 4  | 994106.6528 | 1 | 0           |
| USP10    | 2  | 182243.6571 | 1 | 0           | 4  | 1184864.954 | 1 | 19536.17847 |
| USP40    | 2  | 263460.1962 | 1 | 0           | 2  | 1013373.381 | 1 | 0           |
| VTN      | 3  | 2272054.928 | 1 | 0           | 2  | 780043.4855 | 1 | 0           |
| WDR33    | 10 | 107956646.5 | 4 | 2856365.058 | 6  | 50851086.26 | 1 | 0           |
| WDR5     | 3  | 33570774.81 | 1 | 0           | 1  | 25061300.67 | 1 | 0           |
| WRAP53   | 4  | 374687.0033 | 1 | 0           | 3  | 1979958.234 | 1 | 0           |
| ZFP748   | 1  | 3563383.615 | 1 | 0           | 1  | 3278320.299 | 1 | 0           |
| ZNF326   | 30 | 25456624.14 | 1 | 0           | 19 | 30212400.01 | 1 | 0           |
| ZNFX1    | 5  | 1558483.315 | 1 | 0           | 7  | 2371029.779 | 1 | 0           |

**Table S4. Primers used for the verification of the c.937C>T variant affecting the human *CCDC188* gene.**

| Variant          | Sequence (5'→3')                                | Size   |
|------------------|-------------------------------------------------|--------|
| c.937C>T/p.R313* | CTGCTGTGCTTACCTCCTCTGG<br>CAGGAAGCCGTCCACTTTGAG | 883 bp |

**Table S5. The sgRNA sequence to generate *Ccdc188*-KO mouse strain.**

| Variant | Sequence (5'→3')     | PAM |
|---------|----------------------|-----|
| gRNA-1  | ATCCCTGACAGGGCTGATCC | AGG |
| gRNA-2  | GTCCACTTCGAGGCGCAAGA |     |

**Table S6. Primers for plasmid construction.**

| Name    | Sequence (5'→3')                                                                       | Size    |
|---------|----------------------------------------------------------------------------------------|---------|
| SUN5    | (KpnI) CGGGGTACCCCGATGCCCCGGACGAGGAAC<br>(XbaI) TGCTCTAGAGCAGGATAGGGGCTCTAGGTGTGA      | 1047 bp |
| PMFBP1  | (KpnI) CGGGGTACCCCGATGCTAAAGCTTAAAGGAGAATT<br>(XbaI) TGCTCTAGAGCAGCAGTAGGAGGAGCCTGAG   | 3069 bp |
| CCDC188 | (HindIII) CCCAAGCTTGGGATGGAGGGGCCAAAACCC<br>(EcoRI) CCGGAATTCCGGGAAAGGCAGGAAGTCGTCCACT | 1308 bp |

**Table S7. All antibodies used in this study.**

| Name                                                | Factory     | Catalog    | Application             |
|-----------------------------------------------------|-------------|------------|-------------------------|
| CCDC188 polyclonal antibody                         | Home-made   |            | WB (1:1000), IF (1:200) |
| SUN5 polyclonal antibody                            | Proteintech | 17495-1-AP | WB (1:1000), IF (1:200) |
| PMFBP1 polyclonal antibody                          | Proteintech | 17061-1-AP | WB (1:1000), IF (1:200) |
| $\beta$ -actin monoclonal antibody                  | Abcam       | ab8226     | WB (1:1000)             |
| ac-TUB monoclonal antibody                          | Proteintech | 66200-1-Ig | IF (1:200)              |
| ac-TUB monoclonal antibody                          | CST         | #5335      | IF (1:200)              |
| Flag-tag monoclonal antibody                        | Abmart      | M20008     | IP (1:100), WB (1:2000) |
| Myc-tag monoclonal antibody                         | Abmart      | M20002     | IP (1:100), WB (1:2000) |
| Goat Anti-Rabbit IgG-HRP                            | Abmart      | M21002     | WB (1:5000)             |
| Goat Anti-Mouse IgG-HRP                             | Abmart      | M21001     | WB (1:5000)             |
| Alexa Fluor 488-labeled Goat Anti-Rabbit IgG(H+L)   | Beyotime    | A0423      | IF (1:200)              |
| Alexa Fluor 555-labeled Donkey Anti-Mouse IgG(H+L)  | Beyotime    | A0460      | IF (1:200)              |
| Alexa Fluor 488-labeled Goat Anti-Mouse IgG(H+L)    | Beyotime    | A0428      | IF (1:200)              |
| Alexa Fluor 555-labeled Donkey Anti-Rabbit IgG(H+L) | Beyotime    | A0453      | IF (1:200)              |
